# Supplementary material
Source: HighWire-hosted journal article supplement (doi:10.1101/rna.075176.120)

Figure S1

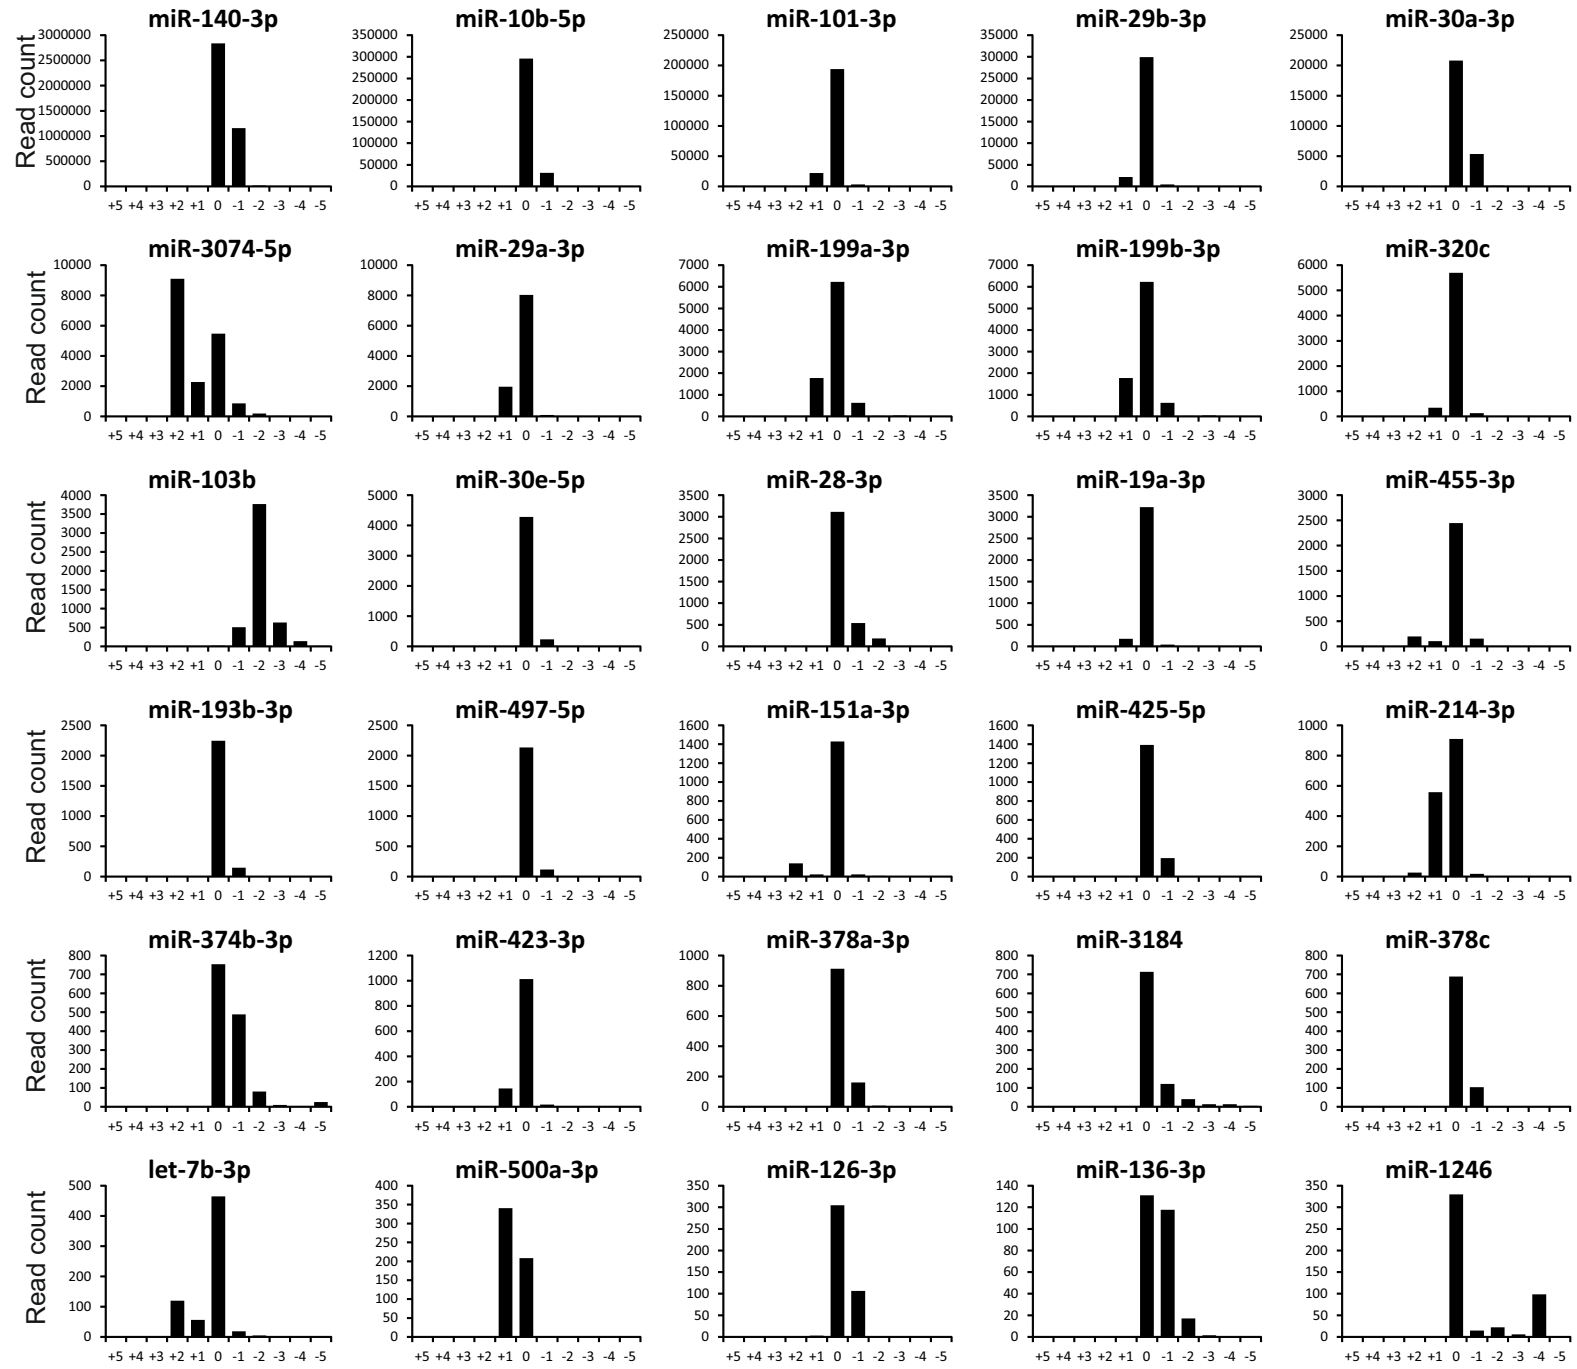

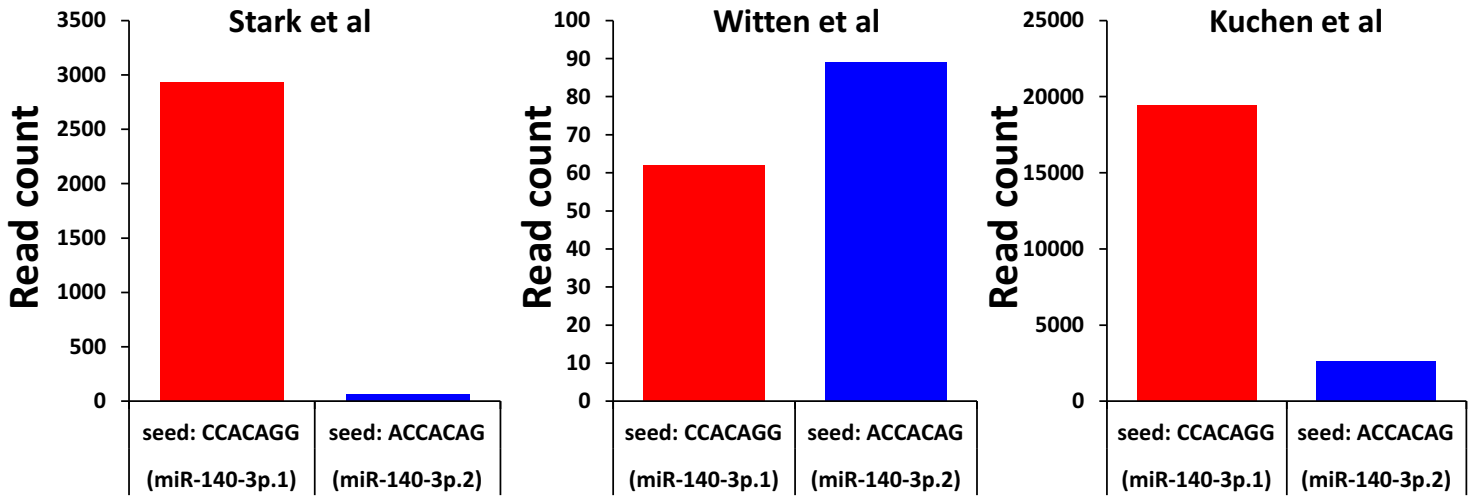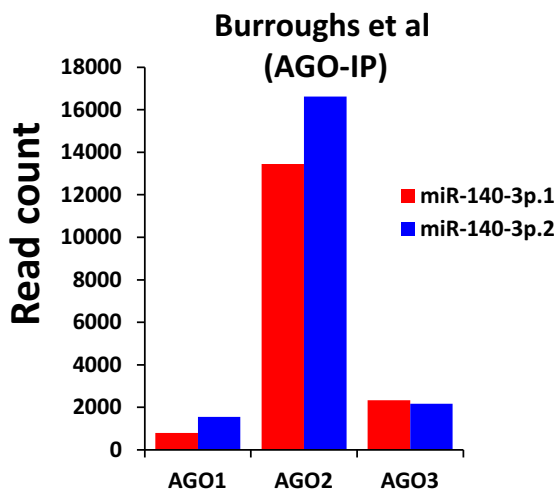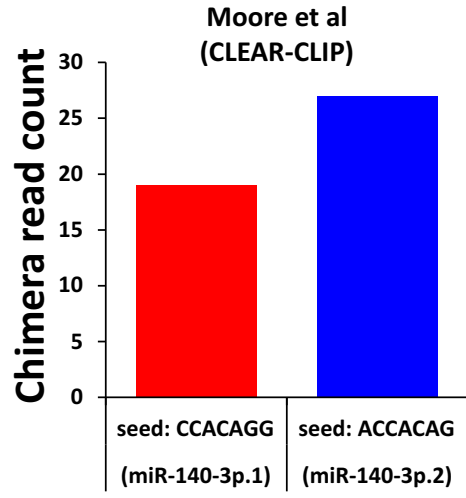

|   | Source | Term Name                                                               | Term ID            | Term size | Intersection | Adjusted P-value |
|---|--------|-------------------------------------------------------------------------|--------------------|-----------|--------------|------------------|
| A | GO:MF  | extracellular matrix structural constituent conferring tensile strength | GO:0030020         | 41        | 5            | 0.04464093       |
| B | GO:BP  | anatomical structure morphogenesis                                      | GO:0009653         | 2820      | 63           | 0.001590813      |
| C | GO:BP  | decidualization                                                         | GO:0046697         | 27        | 6            | 0.001696492      |
| D | GO:BP  | connective tissue development                                           | GO:0061448         | 281       | 15           | 0.004617556      |
| E | GO:BP  | maternal placenta development                                           | GO:0001893         | 38        | 6            | 0.01414184       |
| F | GO:BP  | double-strand break repair via break-induced replication                | GO:0000727         | 11        | 4            | 0.015265416      |
| G | GO:BP  | tube development                                                        | GO:0035295         | 1143      | 32           | 0.021966518      |
| H | REAC   | Unwinding of DNA                                                        | REAC:R-HSA-176974  | 12        | 4            | 0.005710503      |
| I | REAC   | Assembly of collagen fibrils and other multimeric structures            | REAC:R-HSA-2022090 | 60        | 7            | 0.006117096      |

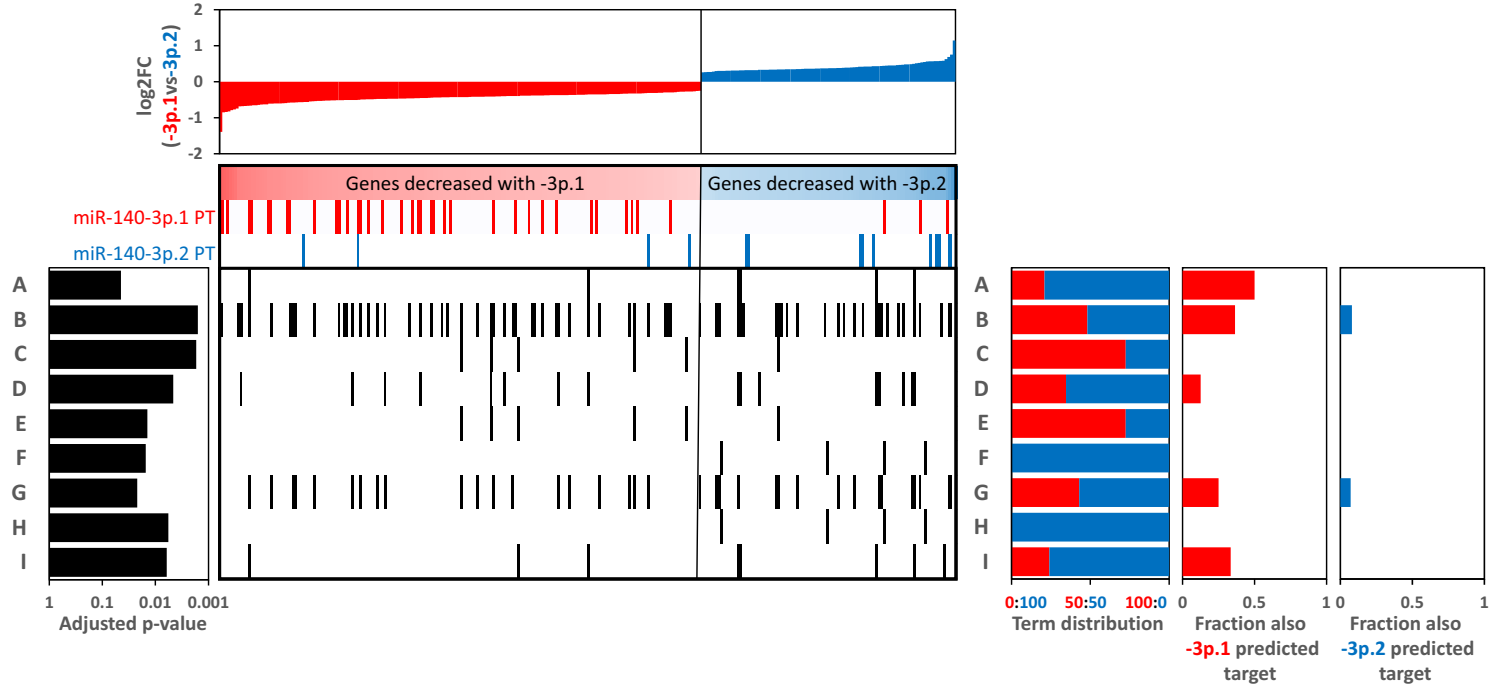

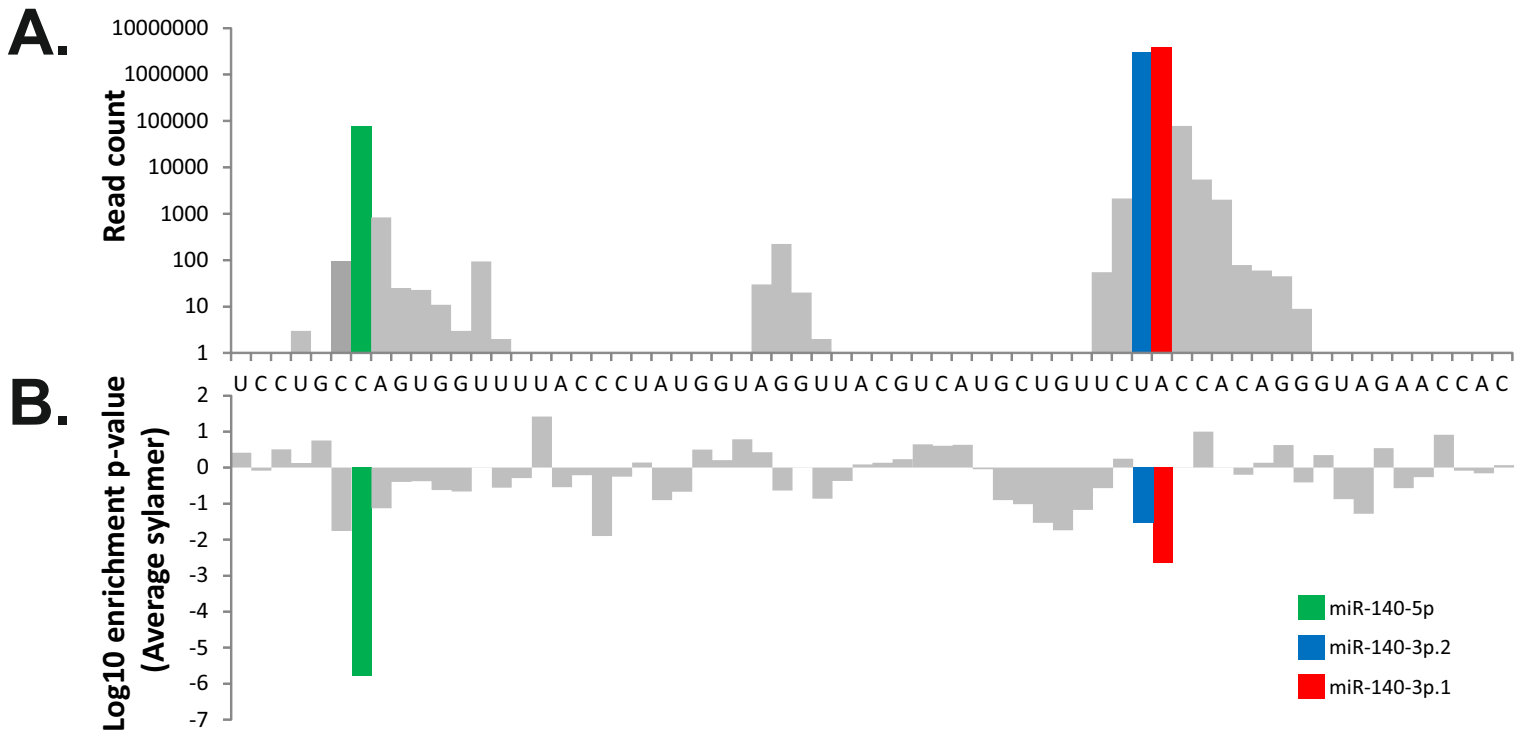

**A.**

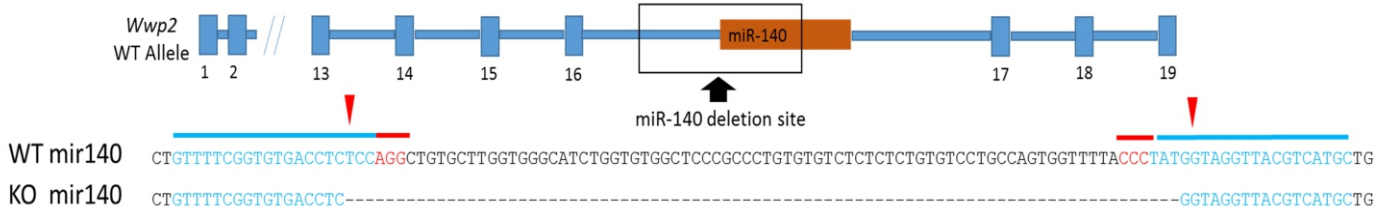

**B.**

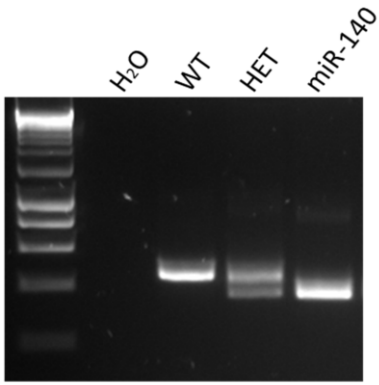

**C.**

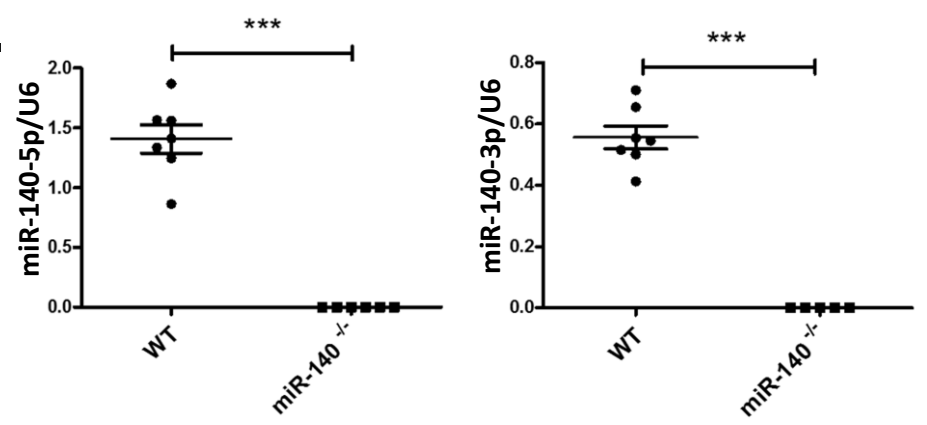

**D.**

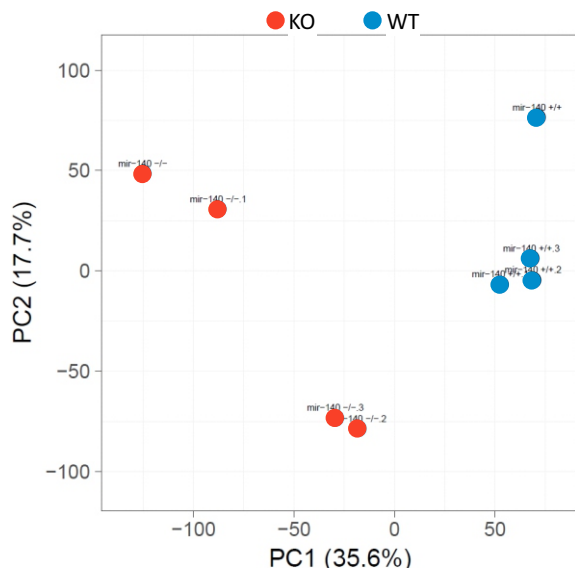

**E.**

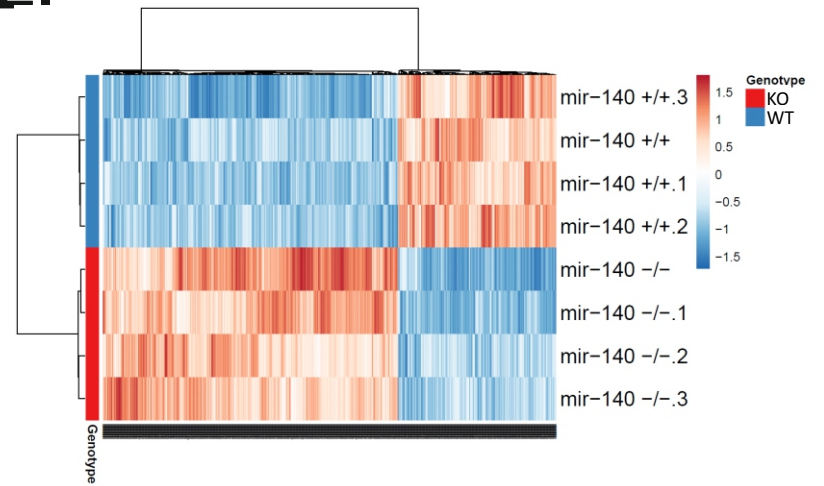

**A.**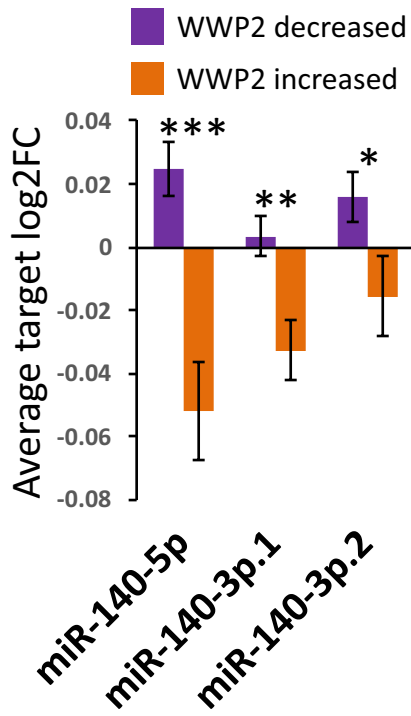**B.**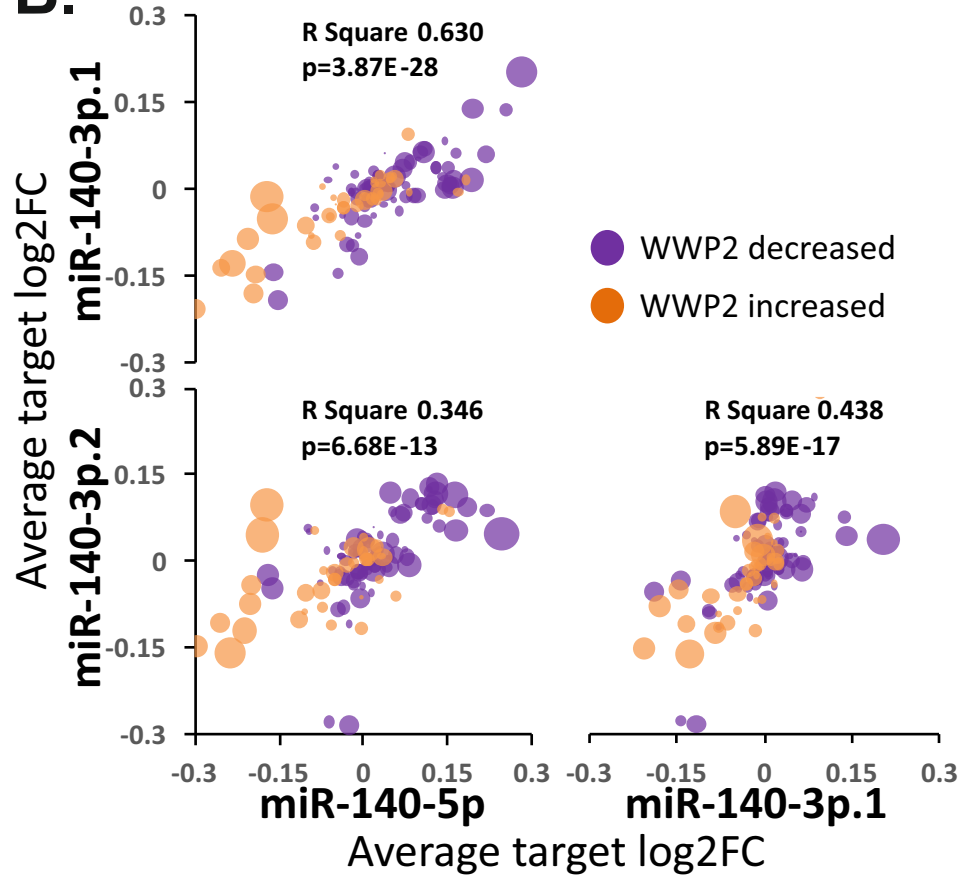**C.**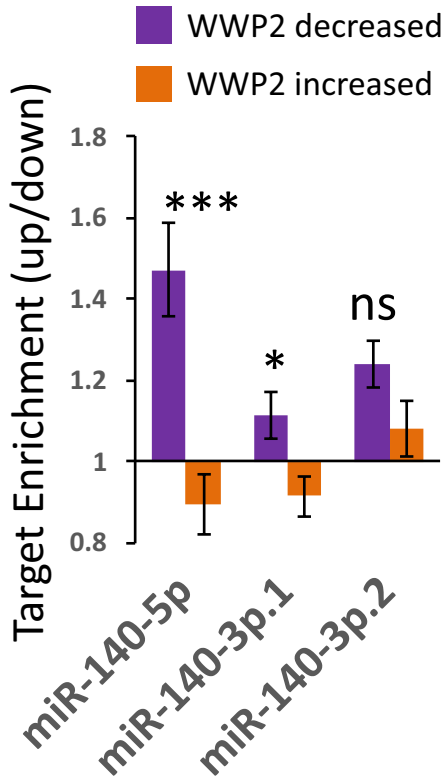**D.**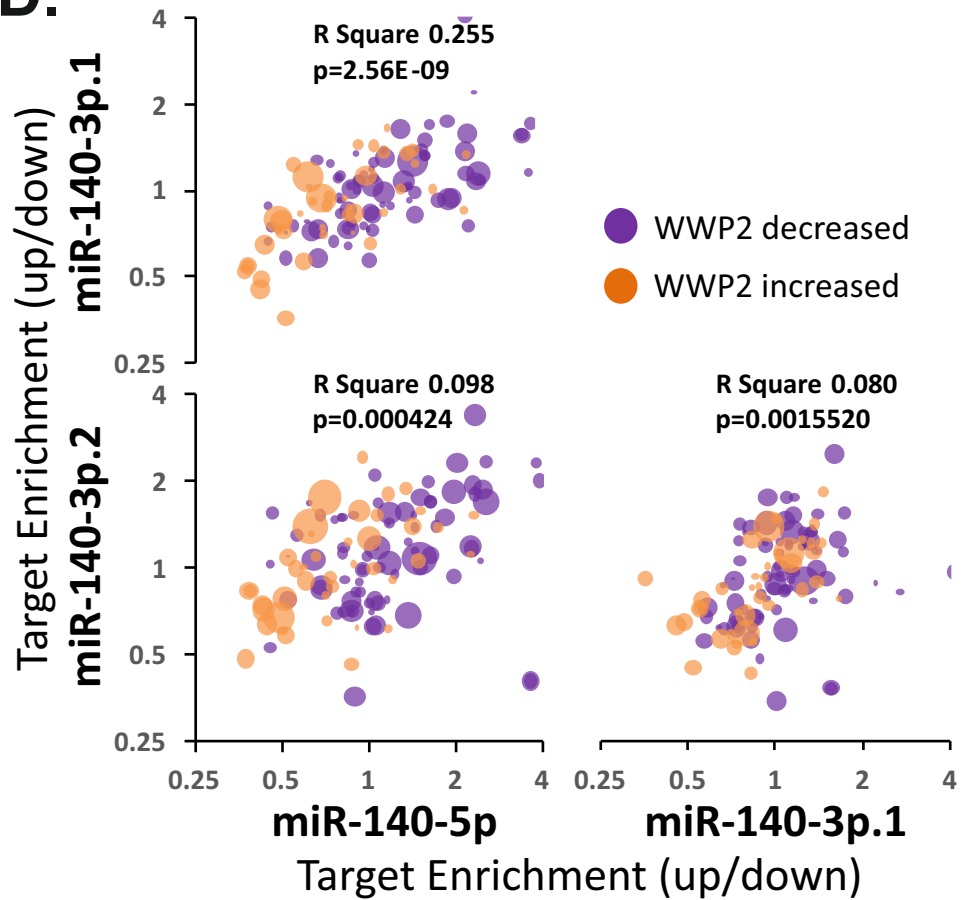

A.

miR-140-5p

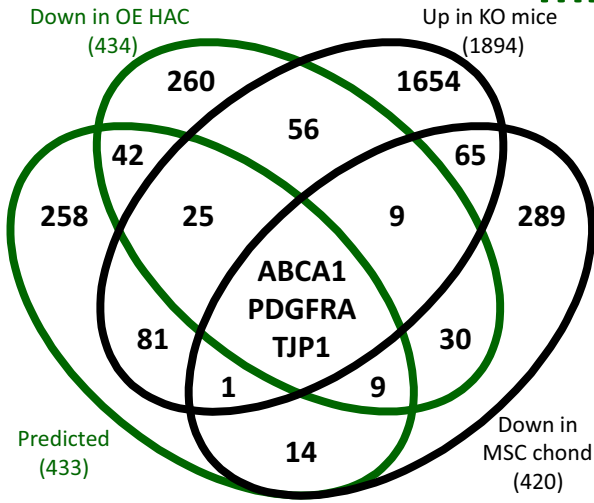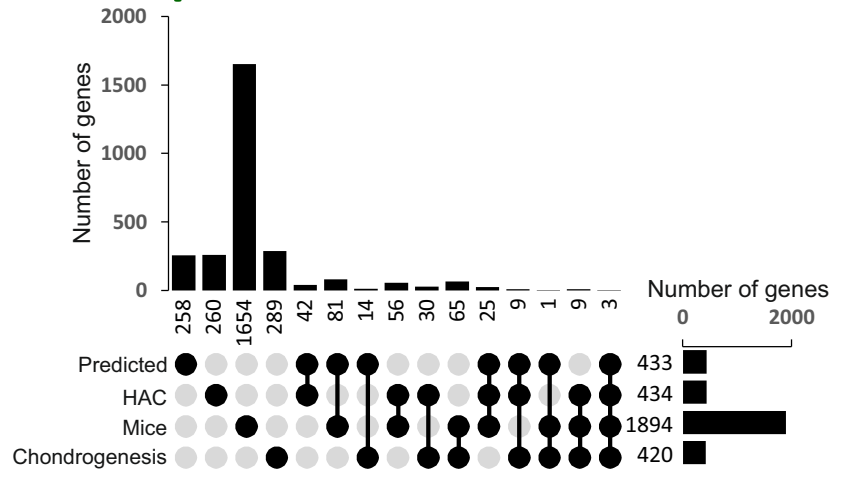

miR-140-3p.1

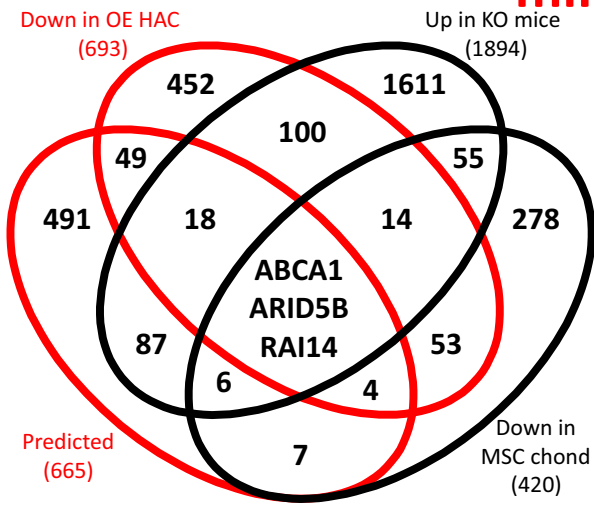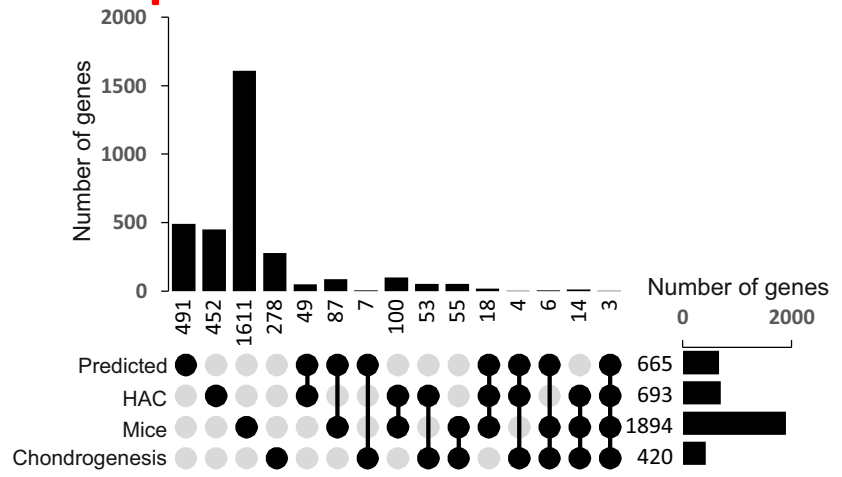

miR-140-3p.2

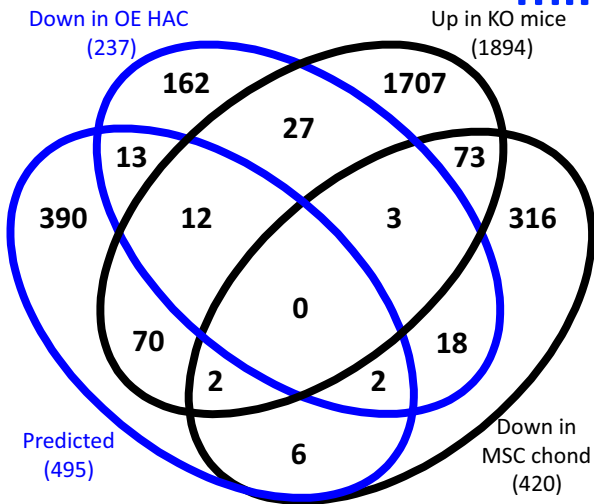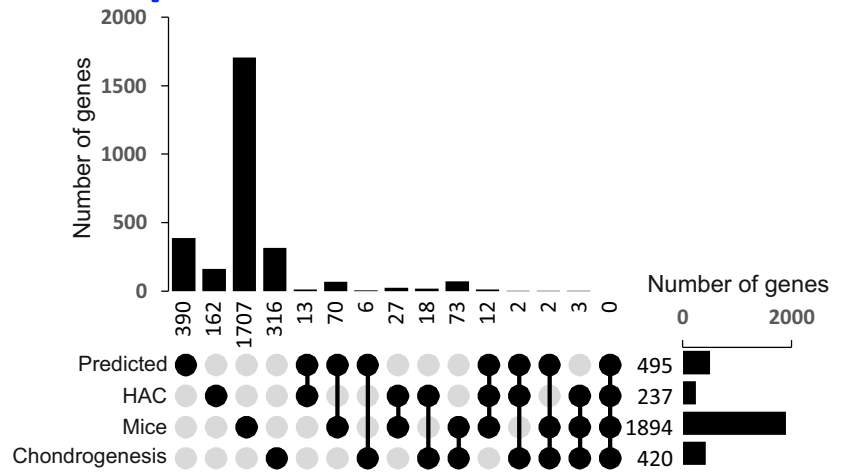

B.

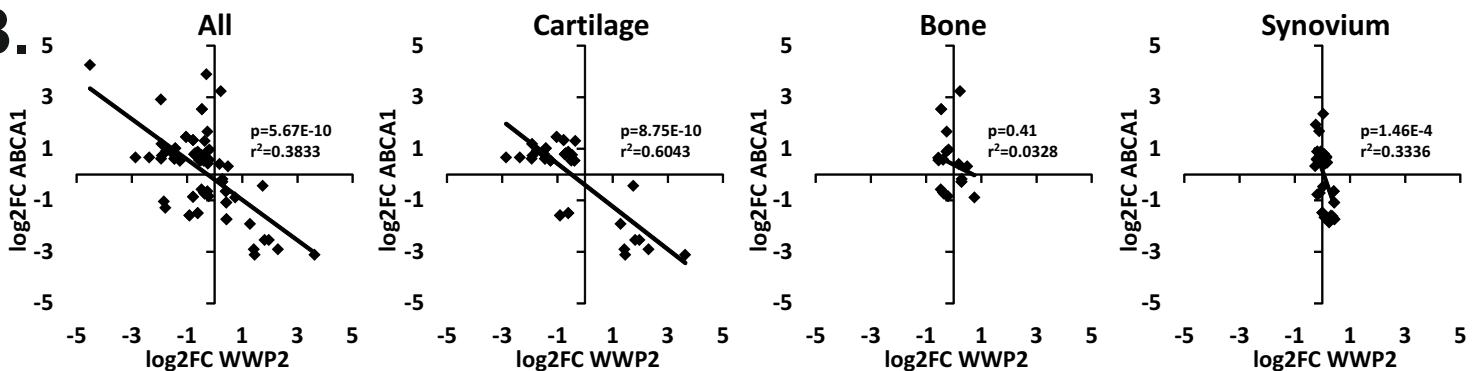

Supplement: Supplemental_Figures.pdf [file Supplemental_Figures.pdf]
